# Supplementary material for: Suppression of unwanted CRISPR-Cas9 editing by co-administration of catalytically inactivating truncated guide RNAs
Source: PubMed Central journal article supplement (PMC7264211; doi:10.1038/s41467-020-16542-9), 2020-06-01
Supplement: 41467_2020_16542_MOESM4_ESM.pdf [file 41467_2020_16542_MOESM4_ESM.pdf]

**Title:** Supplementary data file 1:

**Description:** Primers, amplicons, sgRNA and dRNA templates, hg38 genomic locations, and HDR donors used in this study.
